# Supplementary material for: Small Hexokinase 1 Peptide against Toxic SOD1 G93A Mitochondrial Accumulation in ALS Rescues the ATP-Related Respiration
Source: MDPI journal article supplement (doi:10.3390/biomedicines9080948), 2021-08-03
Supplement: s1 [file s1]

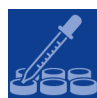

Supplementary materials to:

# Small hexokinase 1 peptide against toxic SOD1 G93A mitochondrial accumulation in ALS rescues the ATP-related respiration

Andrea Magri<sup>1,2†</sup>, Pierpaolo Risiglione<sup>3†</sup>, Antonella Caccamo<sup>4</sup>, Beatrice Formicola<sup>5</sup>, Marianna Flora Tomasello<sup>6</sup>, Cristina Arrigoni<sup>7</sup>, Stefania Zimbone<sup>1</sup>, Francesca Guarino<sup>2,3</sup>, Francesca Re<sup>5</sup> and Angela Messina<sup>1,2\*</sup>

<sup>1</sup> Department of Biological, Geological and Environmental Sciences, University of Catania, Via S. Sofia 64, 95123 Catania, Italy; andrea.magri@unict.it (A. Magri); stefania\_zimbone@libero.it (S.Z.); mess@unict.it (A. Messina)

<sup>2</sup> we.MitoBiotech S.R.L., C.so Italia 172, 95125 Catania, Italy

<sup>3</sup> Department of Biomedical and Biotechnological Sciences, University of Catania, Via S. Sofia 64, 95123 Catania, Italy; pierpaolo.risiglione@phd.unict.it (P.R.); fguarin@unict.it (F.G.)

<sup>4</sup> Department of Drug and Health Sciences, University of Catania, Via S. Sofia 64, 95123 Catania, Italy; acaccamo@gmail.com (A.C.)

<sup>5</sup> School of Medicine & Surgery, BioNanoMedicine Center NANOMIB, University of Milano-Bicocca, Via Cadore 48, Monza, 20900, Italy; b.formicola@campus.unimib.it (B.F.); francesca.re1@unimib.it (F.R.)

<sup>6</sup> Istituto di Cristallografia, CNR, Via Paolo Gaifami 18, 95126, Catania, Italy; mariannaflora.tomasello@cnr.it (M.F.T.)

<sup>7</sup> Department of Biology and Biotechnology, University of Pavia, Via Ferrata 9, 27100, Pavia, Italy; cristina.arrigoni01@unipv.it (C.A.)

\* Correspondence: mess@unict.it

† These authors have equally contributed

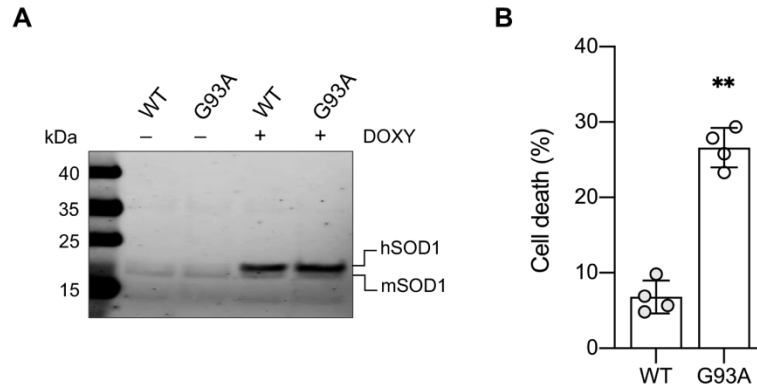

**Figure S1.** Characterization of NSC34 cell lines stably expressing SOD1 proteins. (A) Representative western blot image of total lysate of NSC34-SOD1WT and NSC34-SOD1G93A before and after doxycycline induction. Besides the presence of a lower band detected by the anti SOD1 antibody in all the sample and correspondent to the endogenous mouse SOD1 (mSOD1), a clear additional band was observed exclusively in +DOXY samples. The band correspond to the human myc-tagged SOD1 WT or G93A (hSOD1). A slight hSOD1 band could be detected also in -DOXY due to a basal expression. (B) Cell viability assay of +DOXY NSC34 cells expressing SOD1 WT or G93A. Data are normalized for the correspondent -DOXY cells and are expressed as means  $\pm$  SD of  $n=5$  independent experiments and analyzed by t-test with  $**p<0.01$  relative to WT sample.

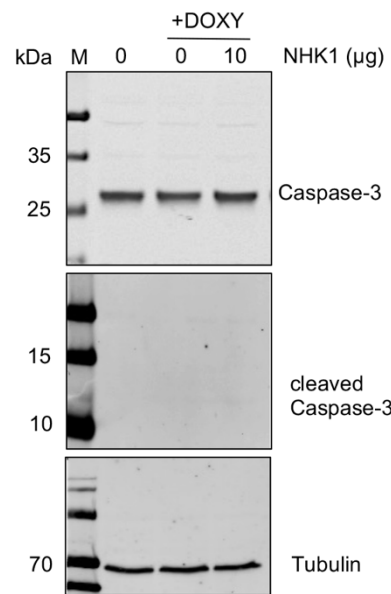

**Figure S2.** Activation of caspase-3 in NSC34-SOD1G93A. Representative western blot of total lysates from +/-DOXY NSC34-SOD1G93A untreated or treated with the NHK1 peptide. The total and cleaved caspase-3 were assayed as a marker of apoptosis. Tubulin was used as loading control.

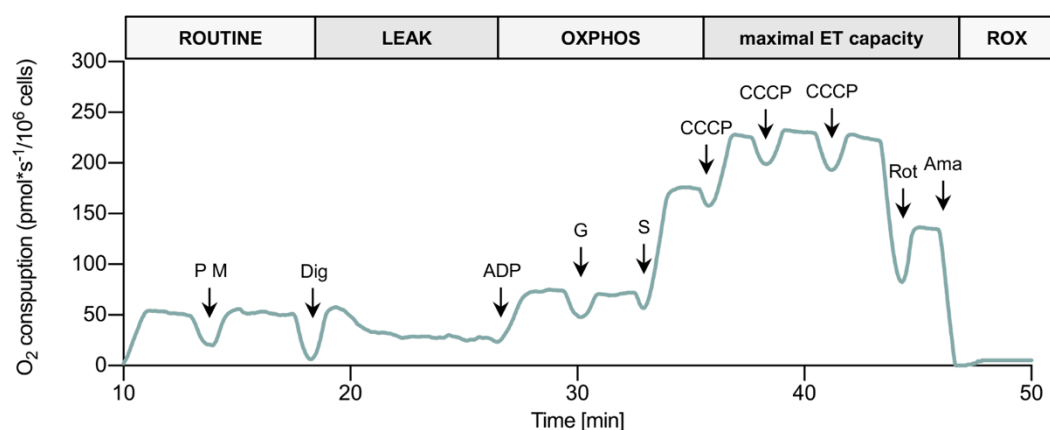

**Figure S3.** Respirometric protocol used in this work. Representative curve displaying the respirometric profile of -DOXY NSC34-SOD1G93A cells and the SUIT protocol applied. The respiratory states ROUTINE, LEAK, OXPHOS, ET, and ROX were achieved with the specific addition of substrates and inhibitors, as following: P, pyruvate; M, malate; Dig, digitonin; G, glutamate; S, succinate; CCCP, carbonyl cyanide 3-chlorophenylhydrazone; Rot, rotenone; Ama, antimycin.

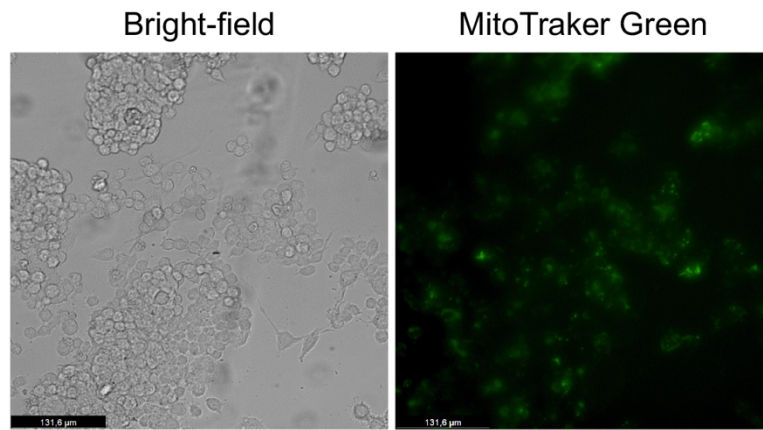

**Figure S4.** Cellular uptake of MitoTraker Green. Representative fluorescence microscopy image of NSC34-SOD1G93A (-DOXY) cells treated with MitoTraker Green.

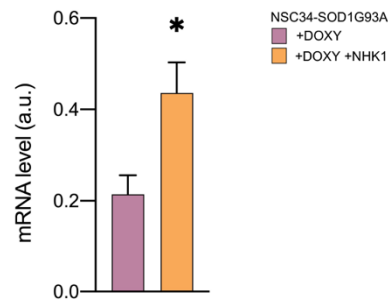

**Figure S5.** Quantitative PCR performed by Real-Time PCR on VDAC1 mRNA extracted from +DOXY NSC34-SOD1G93A cells treated with NHK1 peptide or DMSO. The housekeeping  $\beta$ -actin was used for normalization. Data are expressed as a mean  $\pm$  SD of n=3 independent experiments and analyzed by t-test. Value of \*p<0.05 was taken as significant.

|                           | -DOXY         | +DOXY         | +DOXY +NHKI   |
|---------------------------|---------------|---------------|---------------|
| ROUTINE                   | 52.23 ± 1.8   | 46.09 ± 3.2   | 52.69 ± 3.4   |
| LEAK                      | 21.07 ± 2.7   | 21.58 ± 1.3   | 20.60 ± 2.8   |
| OXPHOS (complex I)        | 75.81 ± 4.9   | 46.94 ± 6.7   | 49.93 ± 8.2   |
| OXPHOS (complex I and II) | 174.40 ± 14.4 | 125.62 ± 10.2 | 151.08 ± 8.4  |
| ETS                       | 208.22 ± 25.0 | 164.16 ± 16.4 | 191.09 ± 23.8 |
| ETS (complex II)          | 116.73 ± 18.5 | 111.46 ± 9.6  | 123.88 ± 18.5 |

**Table S1.** Respiratory fluxes raw data. The ROX-corrected values of oxygen consumption relative to the respiratory states ROUTINE, LEAK, OXPHOS sustained by complex I, OXPHOS sustained by complex I and II (total OXPHOS), ETS and ETS sustained by complex II were obtained from -/+DOXY NSC34-SOD1G93A untreated or treated with NHK1 peptide. Data are expressed as pmol/second per million cells, as means ± SD of n=5 independent experiments
